# Supplementary material for: The Danish Pain Research Biobank (DANPAIN-Biobank): a collection of blood, cerebrospinal fluid, and clinical data for the study of neuroimmune and glia-related biomarkers of chronic pain
Source: PubMed Central journal article supplement — Ann Transl Med. 2023 Jul 17;11(10):343. doi: 10.21037/atm-22-5319 (PMC10477638; doi:10.21037/atm-22-5319), 2023-07-17
Supplement: atm-11-10-343-dss.pdf [file atm-11-10-343-dss.pdf]

## Data Sharing Statement

|                     |                                                                                                                                                     |                                                                                                                                                                                                                                                     |
|---------------------|-----------------------------------------------------------------------------------------------------------------------------------------------------|-----------------------------------------------------------------------------------------------------------------------------------------------------------------------------------------------------------------------------------------------------|
| <b>Article Info</b> | <a href="https://dx.doi.org/10.21037/atm-22-5319">https://dx.doi.org/10.21037/atm-22-5319</a>                                                       |                                                                                                                                                                                                                                                     |
| <b>Item</b>         | <b>Question</b>                                                                                                                                     | <b>Authors' Response<br/>(place "-" if not applicable)</b>                                                                                                                                                                                          |
| 1                   | Would you like to share data collected for your study to others?                                                                                    | The datasets generated during the current study are not publicly available due to data protection legislation in EU and Denmark (GDPR and the Danish Act on Data Protection) but are available from the corresponding author on reasonable request. |
| 2                   | If not, would you like to share the reason for your decision?                                                                                       | The datasets generated during the current study are not publicly available due to data protection legislation in EU and Denmark (GDPR and the Danish Act on Data Protection).                                                                       |
| 3                   | What data in particular will be shared?                                                                                                             | -                                                                                                                                                                                                                                                   |
| 4                   | Any other documents will be shared? Such as study protocol, statistical analysis plan, informed consent form, clinical study report, analytic code. | -                                                                                                                                                                                                                                                   |
| 5                   | When will data availability begin?                                                                                                                  | -                                                                                                                                                                                                                                                   |
| 6                   | When will data availability end?                                                                                                                    | -                                                                                                                                                                                                                                                   |
| 7                   | To whom will you share the data?                                                                                                                    | -                                                                                                                                                                                                                                                   |
| 8                   | For what type of analysis or purpose?                                                                                                               | -                                                                                                                                                                                                                                                   |
| 9                   | How or where can the data/documents be obtained?                                                                                                    | -                                                                                                                                                                                                                                                   |
| 10                  | Any other restrictions?                                                                                                                             | -                                                                                                                                                                                                                                                   |
