# Supplementary material for: The Danish Pain Research Biobank (DANPAIN-Biobank): a collection of blood, cerebrospinal fluid, and clinical data for the study of neuroimmune and glia-related biomarkers of chronic pain
Source: PubMed Central journal article supplement — Ann Transl Med. 2023 Jul 17;11(10):343. doi: 10.21037/atm-22-5319 (PMC10477638; doi:10.21037/atm-22-5319), 2023-07-17
Supplement: atm-11-10-343-supplementary.pdf [file atm-11-10-343-supplementary.pdf]

## Supplementary

**Table S1** Sample handling

| Variables                                                    | Pain-free (n=70) | High impact chronic pain (n=201) | Osteoarthritis pain (n=81) |
|--------------------------------------------------------------|------------------|----------------------------------|----------------------------|
| Fasting, hours, mean (SD)                                    | 7.4 (5.4)        | 6.3 (5.0)                        | 13.2 (2.6)                 |
| Sample collection time CSF, minutes, mean (SD)               | 6.2 (4.0)        | 5.9 (5.1)                        | 7.8 (4.1)                  |
| Time from sampling to freezing of CSF, minutes, mean (SD)    | 20.7 (5.7)       | 19.0 (4.2)                       | 25.9 (7.8)                 |
| Time from sampling to freezing of plasma, minutes, mean (SD) | 18 (5.6)         | 19.2 (9.6)                       | 61.0 (22.1)                |
| Time from sampling to freezing of serum, minutes, mean (SD)  | 53.9 (56.4)      | 47.7 (8.5)                       | 62.5 (22.7)                |
| Puncture time, CSF                                           |                  |                                  |                            |
| 7–9 am, number                                               | 5 (7%)           | 11 (5%)                          | 20 (25%)                   |
| 9–10 am, number                                              | 12 (17%)         | 33 (16%)                         | 12 (15%)                   |
| 10–11 am, number                                             | 15 (21%)         | 32 (16%)                         | 16 (20%)                   |
| 11–12 am, number                                             | 7 (10%)          | 35 (17%)                         | 10 (12%)                   |
| 12–13 pm, number                                             | 10 (14%)         | 29 (14%)                         | 11 (14%)                   |
| 13–14 pm, number                                             | 13 (19%)         | 40 (20%)                         | 11 (14%)                   |
| 14–15 pm, number                                             | 8 (11%)          | 21 (10%)                         | 1 (1%)                     |
| Puncture time, blood                                         |                  |                                  |                            |
| 7–9 am, number                                               | 11 (16%)         | 23 (11%)                         | 54 (67%)                   |
| 9–10 am, number                                              | 12 (17%)         | 32 (16%)                         | 8 (10%)                    |
| 10–11 am, number                                             | 12 (17%)         | 30 (15%)                         | 14 (17%)                   |
| 11–12 am, number                                             | 10 (14%)         | 40 (20%)                         | 4 (5%)                     |
| 12–13 pm, number                                             | 12 (17%)         | 36 (18%)                         | 1 (1%)                     |

SD, standard deviation; CSF, cerebrospinal fluid.

**Table S2** Complications

| Variables                          | All participants (n=389) |
|------------------------------------|--------------------------|
| Post dural-puncture headache       | 6 (1.5%)                 |
| Back pain                          | 24 (6.2%)                |
| Soreness at puncture site          | 38 (9.8%)                |
| Worsening of existing headache     | 8 (2%)                   |
| Worsening of existing sciatic pain | 1 (0.3%)                 |
| Dizziness                          | 1 (0.3%)                 |

Total n=389 participants on whom spinal puncture was performed.
